# Supplementary material
Source: PubMed Central journal article supplement (PMC8901122)
Supplement: NIHMS127909-supplement-Experimental_Details.pdf [file NIHMS127909-supplement-Experimental_Details.pdf]

# Supporting Information for World Wide Web Edition

## Heme O Synthase and Heme A Synthase From *Bacillus subtilis* and *Rhodobacter sphaeroides* Interact in *Escherichia coli*

by

Brienne M. Brown, Zhihong Wang, Kenneth R. Brown, Julia A. Cricco, Eric L. Hegg\*

Department of Chemistry  
University of Utah  
Salt Lake City, UT 84112-0850  
[Hegg@chem.utah.edu](mailto:Hegg@chem.utah.edu)  
Phone: (801) 585-0776  
FAX: (801) 581-8433

## **Cloning of heme O synthase (HOS) and heme A synthase (HAS) from *R. sphaeroides* and preparation of expression plasmids**

*Cloning of cox10 (RSP1827).* The *cox10* gene (0.9 kb) was amplified from plasmid pCF102 by PCR using standard conditions. *Nde*I and *Xba*I restriction sites were introduced into the 5' and 3' ends of *cox10* using the forward primer 5'-TGGATTCCATATGACCGACATCCGTATCACC-3' and reverse primer 5'-GCTCTAGATCACCAGCCTCCCAGTCC-3'. The PCR product was ligated into the pGEM vector and subcloned into pET-15b, pET-9d, and pET-29a(+). The sequence of *cox10* was confirmed using the forward primer 5'-ATCGGGCTCGCGTCTC-3', the reverse primer 5'-GCCGGCGTCGGAATAGTC-3', and the PCR primers. Standard methods were used for all the transformations, and transformants were selected on LB-Agar plates containing appropriate antibiotic(s).

*Cloning of cox15 (RSP3831).* ORF RSP3831 (1.2 kb) was amplified from the genomic DNA of *R. sphaeroides* 2.4.1 [Pappas, 2004 #932] by PCR using standard conditions. *Nde*I and *Kpn*I restriction sites were introduced into the 5' and 3' ends of *cox15* (RSP3831) using the forward primer 5'-AGCCATATGGCAGTGAAAAAGCGC-3' and the reverse primer 5'-GCGACGGGTACCTCATAGCGTTCCTTCCGG-3'. A C-terminally tagged derivative of *cox15* was also prepared using the reverse primer 5'-GATCCGGAAAGGAACTCTAATGGCTAGCATGACTGGTGGACAGCAAATGGGT TGAATCGGTACCAGACCGAG-3' (C-terminal T7 epitope tag). The PCR products were inserted into the *Nde*I and *Kpn*I restriction sites of pUC18. The sequence of *cox15* was confirmed with the forward primers 5'-TTGTCTGTAAGCGGATGCC-3' and 5'-TTCCTGCCCCGCCGAGATG-3', and the reverse primer 5'-GTGACGGGGCGCCATTC-3'. Expression plasmids were constructed by inserting *Nde*I/*Eco*RI fragments of *cox15* into pET-21a(+).

**Table S1:** Characteristics of plasmids used in this study.

| Plasmid                           | Vector     | Insert               | Selection  | Cloning Sites | Epitope                         |
|-----------------------------------|------------|----------------------|------------|---------------|---------------------------------|
| pUC18-Cox15                       | pUC18      | <i>cox15</i> (1.2kb) | <i>Amp</i> | NdeI, KpnI    | none                            |
| pUC18-Cox15-cT7                   | pUC18      | <i>cox15</i> (1.2kb) | <i>Amp</i> | NdeI, KpnI    | c-T7 <sup>a</sup>               |
| pET21a(+)-Cox15                   | pET-21a(+) | <i>cox15</i> (1.2kb) | <i>Amp</i> | NdeI, EcoRI   | none                            |
| pET21a(+)-Cox15-cT7               | pET-21a(+) | <i>cox15</i> (1.2kb) | <i>Amp</i> | NdeI, EcoRI   | c-T7 <sup>b</sup>               |
| pET21a(+)-Cox15-cHis <sub>6</sub> | pET-21a(+) | <i>cox15</i> (1.2kb) | <i>Amp</i> | NdeI, EcoRI   | c-His <sub>6</sub> <sup>b</sup> |
| pGEM-Cox10                        | pGEM       | <i>cox10</i> (0.9kb) | <i>Amp</i> | A-T sites     | none                            |
| pET15b-Cox10-nHis <sub>6</sub>    | pET-15b    | <i>cox10</i> (0.9kb) | <i>Amp</i> | NdeI, NdeI    | n-His <sub>6</sub>              |
| pET9d-Cox10-nHis <sub>6</sub>     | pET-9d     | <i>cox10</i> (0.9kb) | <i>Kan</i> | BglII, BlnI   | n-His <sub>6</sub> <sup>c</sup> |
| pET29a(+)-Cox10                   | pET-29a(+) | <i>cox10</i> (0.9kb) | <i>Kan</i> | NotI, NcoI    | none                            |
| pET3d-CtaA                        | pET-3d     | <i>ctaA</i> (0.9kb)  | <i>Amp</i> | NcoI, BamHI   | none                            |
| pET9d-CtaA                        | pET-9d     | <i>ctaA</i> (0.9kb)  | <i>Kan</i> | NcoI, BamHI   | none                            |
| pET9d-CtaA-cHis <sub>6</sub>      | pET-9d     | <i>ctaA</i> (0.9kb)  | <i>Kan</i> | NcoI, BamHI   | c-His <sub>6</sub> <sup>a</sup> |
| pET29a(+)-CtaB                    | pET-29a(+) | <i>ctaB</i> (0.9kb)  | <i>Kan</i> | NdeI, BamHI   | none                            |
| pET9a-CtaB                        | pET-9a     | <i>ctaB</i> (0.9kb)  | <i>Kan</i> | NdeI, BamHI   | none                            |
| pET3a-CtaB                        | pET-3a     | <i>ctaB</i> (0.9kb)  | <i>Amp</i> | NdeI, BamHI   | none                            |
| pET3a-CtaB-nT7                    | pET-3a     | <i>ctaB</i> (0.9kb)  | <i>Amp</i> | BamHI, BamHI  | n-T7                            |

<sup>a</sup>This epitope tag was introduced via appropriately designed PCR primers.

<sup>b</sup>This insert was subcloned from pUC18-cox15-cT7/cHis<sub>6</sub>.

<sup>c</sup>This insert was subcloned from pET15b-cox10-nHis.

**Table S2:** A summary of all strains used for the figures of this paper. All expression studies were executed in BL21(DE3) strain containing pLysS.

| Figure              | HOS plasmid                   | HAS plasmid                                        |
|---------------------|-------------------------------|----------------------------------------------------|
| 1A chromatogram 1   | none                          | none                                               |
| 1A chromatogram 2   | pET29a(+)-Cox10               | none                                               |
| 1A chromatogram 3   | pET29a(+)-Cox10               | pET21a(+)-Cox15                                    |
| 1B chromatogram 1   | none                          | none                                               |
| 1B chromatogram 2   | pET29a(+)-CtaB                | none                                               |
| 1B chromatogram 3   | pET29a(+)-CtaB                | pET3d-CtaA                                         |
| 2A column 1         | pET29a(+)-Cox10               | none                                               |
| 2A column 2         | pET29a(+)-Cox10               | empty pET-21a(+)                                   |
| 2A column 3         | pET29a(+)-Cox10               | pET21a(+)-Cox15                                    |
| 2A column 4         | pET29a(+)-Cox10               | pET3d-CtaA                                         |
| 2B column 1         | pET29a(+)-CtaB                | none                                               |
| 2B column 2         | pET29a(+)-CtaB                | empty pET-3d                                       |
| 2B column 3         | pET29a(+)-CtaB                | pET3d-CtaA                                         |
| 2B column 4         | pET29a(+)-CtaB                | pET21a(+)-Cox15                                    |
| 3A,B                | pET3a-CtaB-nT7                | pET9d-CtaA-cHis <sub>6</sub>                       |
| 3C,D                | pET3a-CtaB-nT7                | pET9d-CtaA-cHis <sub>6</sub>                       |
| 4                   | none                          | pET9d-CtaA-cHis <sub>6</sub>                       |
| 4                   | pET3a-CtaB-nT7                | none                                               |
| 5A                  | none                          | pET9d-CtaA-cHis <sub>6</sub>                       |
| 5B                  | pET3a-CtaB-nT7                | none                                               |
| 5C                  | pET9d-Cox10-nHis <sub>6</sub> | none                                               |
| 5D                  | none                          | pET21a(+)-Cox15-cT7                                |
| 6A,B                | none                          | pET9d-CtaA-cHis <sub>6</sub> , pET21a(+)-Cox15-cT7 |
| 6C,D                | none                          | pET9d-CtaA-cHis <sub>6</sub>                       |
| 6C,D                | none                          | pET21a(+)-Cox15-cT7                                |
| 7A,B                | pET9d-Cox10-nHis <sub>6</sub> | pET21a(+)-Cox15-cT7                                |
| 7C,D                | pET3a-CtaB-nT7                | pET21a(+)-Cox15-cHis <sub>6</sub>                  |
| S2                  | pET29a(+)-Cox10               | pET21a(+)-Cox15                                    |
| S3                  | pET29a(+)-Cox10               | pET21a(+)-Cox15                                    |
| S4 column 1 (left)  | pET3a-CtaB-nT7                | none                                               |
| S4 column 2         | pET3a-CtaB-nT7                | pET9d-CtaA-cHis <sub>6</sub>                       |
| S4 column 3         | none                          | pET9d-CtaA-cHis <sub>6</sub>                       |
| S4 column 4         | none                          | pET21a(+)-Cox15-cT7                                |
| S4 column 5         | pET9d-Cox10-nHis <sub>6</sub> | pET21a(+)-Cox15-cT7                                |
| S4 column 6 (right) | pET9d-Cox10-nHis <sub>6</sub> | none                                               |
| S5                  | pET3a-CtaB-nT7                | pET9d-CtaA-cHis <sub>6</sub>                       |

CLUSTAL W (v. 1.82) multiple sequence alignment.

```

S. cerevisiae  -----MLFRNIEVGRQAAKLLTRTSSRLAWQSIGASRNISTIRQQIRKTQLYNFKKTVS 54
H. sapien      -----MQRLLFPPPLRALKGRQYLLPLAPRAAPRAQCDCIRRPLRPGQYS----- 44
S. pombe       MNISRSSGLMRQFLQLPLRKGCDISCLGRSSWRMSRSFSGSSVLNEINLSRTKNLFLNDC 60
RSP3831         -----MAVKKRSIFEEVQGQAKAPVPQGGSIDRGHGG----- 32
                . . . : .

S. cerevisiae IRPFSLSPPVFKPHVASESNP-----IESRLKTSKNVAYWLIGTSGLVFGIVVLGGLTR 108
H. sapien     ----TISEVALQSGRGTVSLP-----SKA---AERVVGRWLLVCSGTAVAGAVILGGVTR 91
S. pombe      KFNKNSFEKFFARRLSNSVAPTGGILQETEKIPSKKVAFWLLGSSALVLAIVVVGGITR 120
RSP3831        -----ARRGIRLWLMALFLLVMAMIVVGGGLTR 59
                . : : **: * . :::*:**

S. cerevisiae LTESGLSITEWKPVTGTLPPMNOKEWEEEFIKYKESPEFKLLNSHIDLDEFKFIFFMEWI 168
H. sapien     LTESGLSMVDWHLIKEMKPPTSQEEWEAEFQRYQQFPFKILNHDMTLTFKFIWYMEYS 151
S. pombe      LTESGLSITEWKPIITGVIPPLTDEQWNQEFELYKKSPEFEKLNHMTVDEFKNIFFWEWF 180
RSP3831        LTDSGLSITEWRPVTGAVPPLNETQWAAEFDKYRDSPOYRLMAGMTLAEFQRIYWWEWG 119
                **::**:::.*: .: ** .: :* ** *.: *.: .:* : : **: *.: *

S. cerevisiae HRLWGRAIGAVFILPAVYFAVSKKTSGHVNKRLFGLAGLLGLQGFGVWVMVKSGLDQEQ 228
H. sapien     HRMWGRLVGLVYILPAAYFWRKGWLSRGMKGRVLALCGLVCFQGLLGWYVKSGLLEEK-- 209
S. pombe      HRVLRGIGLTIILLPSIYMIIVTKRASPLSKRLIGLTGLVGLQGVIWVMVKSGLSEELF 240
RSP3831        HRQLGRVIGLVWAVGFLGLAARRIPRGWWRLLALGALGGLQGIGWVMVASGLEGD-- 177
                ** ** :* . : : . *.:* . * :** :*:** **

S. cerevisiae DARKSKPTVSQYRLTTHLGTAFFLYMGMLWTGLEILRECKWIKNPVQAI SLFKKLDNPAI 288
H. sapien     SDSHDI PRVSQYRLAAHLGSALVLYCASLWTSLSLL-----LPPHKLPETHQL 257
S. pombe      SDGS-HPRVSHYRLATHLAAVALYIGLVWVTHGHGILQRHAF LKSMKSGSTSQ L TSMVSSV 299
RSP3831        ----KVTVESTRLATHLGLAFIILGLIAWQALLG-----RSESDLQARR 219
                * . **::** . * . : * . :

S. cerevisiae GPMRKISLAL---LAVSFLTAMSGMVAGLDAGWVYNTWPKMGER-WFPSSRELMDENFC 344
H. sapien     LQLRRFAHGT---AGLVFLTALSGAFVAGLDAGLVYNSFPKMGES-WIPEDLFTFSP--- 310
S. pombe      QKMKGFRTSVNSFVGLVLIITLLSGAFVAGLDAGMIYCTFP EMGEGRLAPSKSELFDQRF 359
RSP3831        QKDGRLVTLTTLVLIQVAFVGLVGLVAGIDAGRGFPPTWPD MNGT-FLPAEMFYVPG--V 276
                : . : : : *.:**::** : :*. * . * .

S. cerevisiae RREDKKDLWWRNLLLENPVTVQLVHRTCAVVAFTSVLAAHMYAIAKKKAVIPRNAMTSLHVM 404
H. sapien     -----ILRNVFENPTMVQFDHRIILGITSVT--AITVLYFLSRRIPRRTKMAAVTL 360
S. pombe      RKDDKSDLIWRNMIDNPSLVQLEHRIILAITTFV AACGLFIFSRAKRNILPKKIKTSINVV 419
RSP3831        ETDWRNPAWWLGLLQNPQVQFLHRMAGYTLAALGLIFWIFGRRSR---HRATRGAFDLL 333
                .:*** ** : * . . . : : : :

S. cerevisiae MGVVTLQATLGILITILYLVPISLASHQAGALALLTSSLVFASQLRKPRAPMRNVIITLP 464
H. sapien     LALAYTQG----PVLFNFTFKISDLDEG-----IRNI----- 388
S. pombe      TGVVTAQATLGIMTLIYVVPVPLAALHQAGSLVTLTAALS LAQR-LHPEYALKNIRSWTK 478
RSP3831        AMALLAQIILLGVGTVLSAAEQVAIAHQVG-----AVVIWVLILHAR 375
                * .: : : : : :

S. cerevisiae HSSKVTSKILSEASKLASKPL----- 486
H. sapien     -----
S. pombe      LISSPPKSSISSILTQQRQFHTFRPSFHSEIKKPLPGTGIKVFFVTPEGREIMIEGNEG 538
RSP3831        HLALYPRVGSIRKGTL----- 391

```

**Figure S1:** An alignment of the expected gene product of ORF RSP3831 from *R. sphaeroides* and heme A synthases from various eukaryotes (Cox15p). Heme A synthase from *S. pombe* has been truncated to remove a fused C-terminal mitochondrial ferredoxin domain (Barros et al. *FEBS Lett.* **2001**, 492, 133-138). We propose that ORF RSP3831 should be named *cox15* based on this sequence similarity and protein function. Three His residues and two Arg residues (highlighted) are conserved across multiple eukaryotic and prokaryotic organisms and may be important for function.

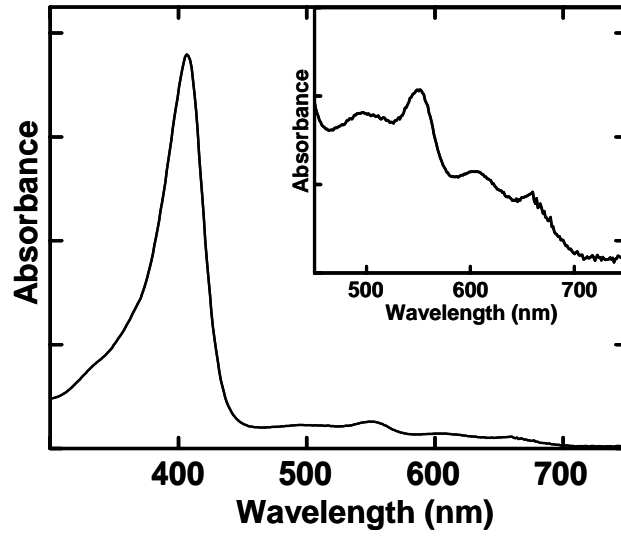

**Figure S2:** Optical spectra of heme A isolated from *E. coli* cells expressing both HOS (pET29a(+)-Cox10) and HAS (pET21a(+)-Cox15) from *R. sphaeroides*.

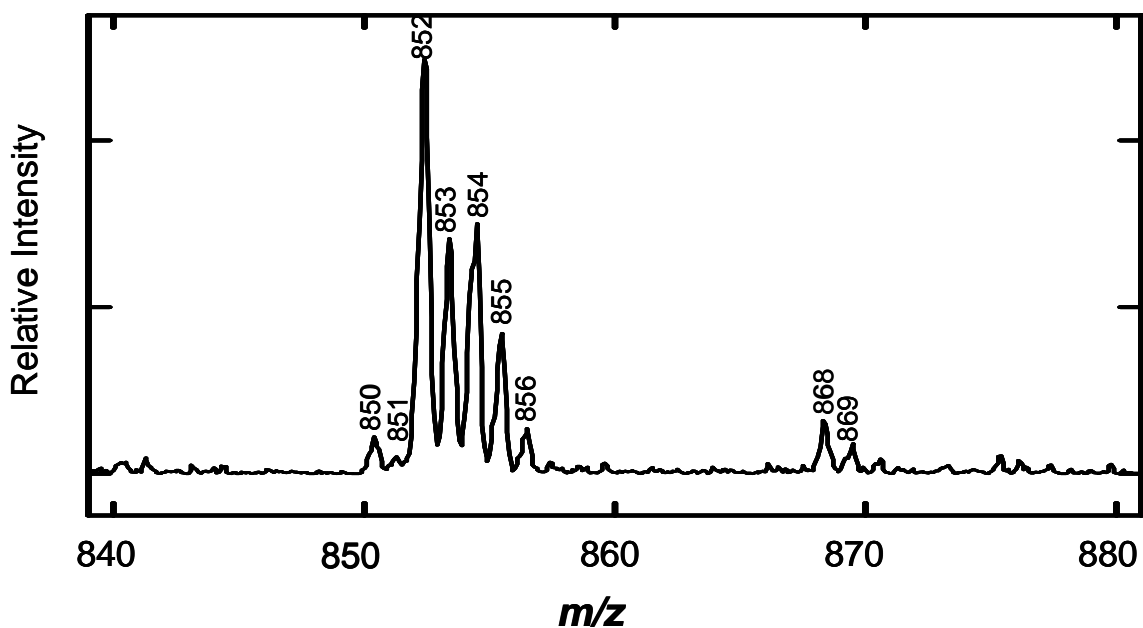

**Figure S3:** Mass spectral analysis of heme A isolated from *E. coli* cells expressing both HOS (pET29a(+)-Cox10) and HAS (pET21a(+)-Cox15) from *R. sphaeroides*. The molecular weight of heme A is 852 g/mol. Overlaying the isotopic pattern of heme A is the C8 alcohol derivative of heme O which has a molecular weight of 854 g/mol. Also seen in the mass spectrum is the C8 carboxylate derivative of heme O which has a molecular weight of 868 g/mol. All of these heme derivatives have been previously identified and characterized by our lab (see Brown et al. *Biochemistry* **2002**, *41*, 10906-10913).

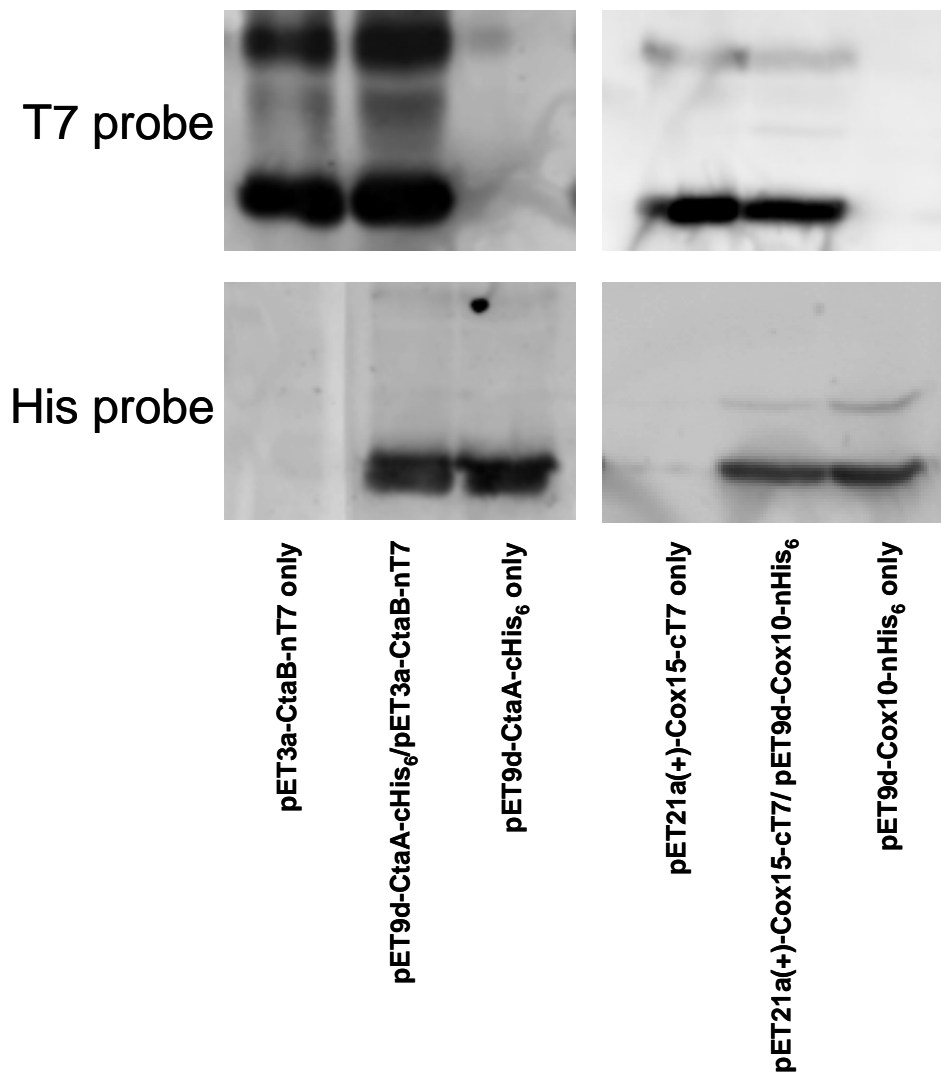

**Figure S4:** Western blot analysis of lysates from cells expressing epitope-tagged HOS and HAS either individually or in combination. The results of the T7 antibody demonstrate that CtaB-nT7 (bottom band) and Cox15-cT7 (bottom band) are expressed at the same level regardless of the presence or absence of the expression of its physiological partner. Likewise, the results of the anti 6x His antibody demonstrate that CtaA-cHis<sub>6</sub> and Cox10-nHis<sub>6</sub> are expressed at the same level regardless of the presence or absence of CtaB-nT7 and Cox15-cT7, respectively. Furthermore these experiments also demonstrate that the antibodies do not recognize these proteins in the absence of the appropriate epitope tag.



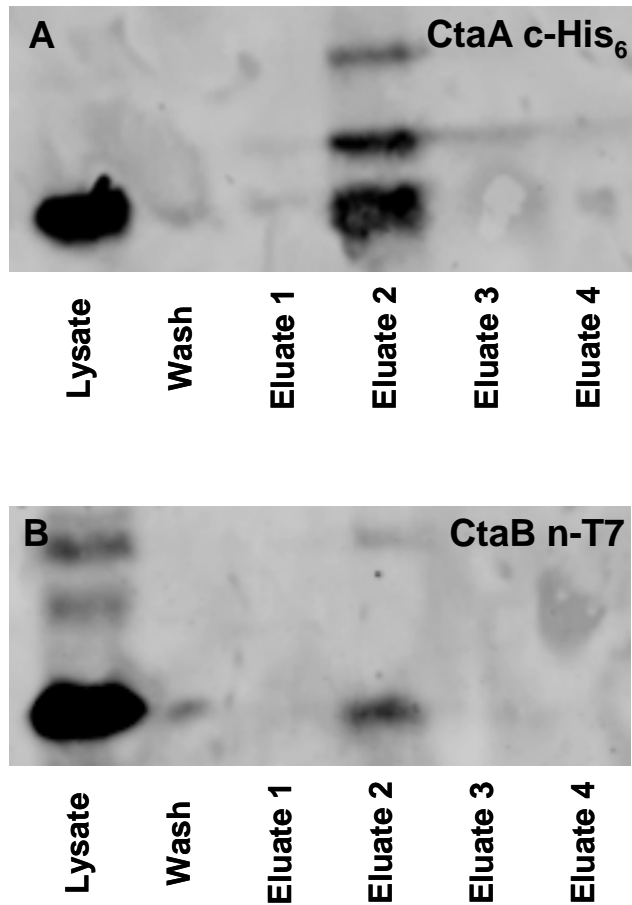

**Figure S5:** Western blot analysis of proteins purified from *E. coli* cells coexpressing CtaA-cHis<sub>6</sub> (pET9d-CtaA-cHis<sub>6</sub>) and CtaB-nT7 (pET3a-CtaB-nT7). Cell Lysates were solubilized with 0.5% n-dodecyl β-D-maltoside. (A) CtaA-cHis<sub>6</sub> (bottom band) purified on a Ni-NTA column. (B) The same fractions probed with a T7 antibody demonstrate that CtaB-nT7 (bottom band) copurifies with CtaA-cHis<sub>6</sub> when n-dodecyl β-D-maltoside is used as the detergent.
